# Supplementary material
Source: publisher site journal article supplement (https://www.spandidos-publications.com/6807/downloadSupplementary)
Supplement: Supplementary file 1 [file downloadSupplementary]

## Sheet: Sheet1
Table SXIV. Cluster analysis of piwi-interacting RNA plasma samples.
Group	Sample_id	Cluster	Location:	Coordinates	Seq hit loci	Mapped reads (normalised)	norm.reads with 1T(1U)	norm.reads with 10A	piRNAs mapping to this cluster	Size [bp]:	Predicted directionality:	repeatmasker annotation	repeatmasker class	geneset annotation
normal	N-12	Cluster 1	chr1	2893326-2894508	5	7	100	0		1183	mono:plus
normal	N-12	Cluster 3	chr10	106014633-106021117	2	19	100	63.2		6485	mono:plus	MIRc,AluJb,L2a,L1MB1,L2c	SINE/MIR,SINE/Alu,LINE/L2,LINE/L1,LINE/L2	GSTO1
normal	N-12	Cluster 4	chr11	63978724-63987908	4	72	100	12.5	hsa-piR-15181,hsa-piR-15183,hsa-piR-20116,hsa-piR-20117,hsa-piR-20118,hsa-piR-20792,hsa-piR-22269,hsa-piR-23197,hsa-piR-28117,hsa-piR-32002,hsa-piR-32652,	9185	mono:plus	(CCCCA)n,L2b,L2,AluSx,AluSp,HAL1,AluSq2,L1ME1,AluJr,AluSz,AluSx3,AluY,L2c,(GGGCAG)n	Simple_repeat,LINE/L2,LINE/L2,SINE/Alu,SINE/Alu,LINE/L1,SINE/Alu,LINE/L1,SINE/Alu,SINE/Alu,SINE/Alu,SINE/Alu,LINE/L2,Simple_repeat	FERMT3
normal	N-12	Cluster 10	chr19	1074059-1081823	6	100	88	0	hsa-piR-15181,hsa-piR-15182,hsa-piR-20115,hsa-piR-20116,hsa-piR-20117,hsa-piR-20118,hsa-piR-20792,hsa-piR-22269,hsa-piR-23197,hsa-piR-28117,hsa-piR-32652	7765	mono:plus	G-rich,(GGCG)n,AluSx,AluJr,L1MC4a,AluSx1,AluJr4,AluSz, AluY, AluSg4,	Low_complexity,Simple_repeat,SINE/Alu,SINE/Alu,LINE/L1,SINE/Alu,SINE/Alu,SINE/Alu,SINE/Alu,SINE/Alu	HMHA1
normal	N-12	Cluster 11	chr19	49969266-49973843	2	20	100	100		4578	mono:plus	MIRb,Charlie9,MSTA,AluSx3,AluJr,AluJb,MSTB,AluY,L1PA8A,LTR46,L1M5,AluSx1,AluJr4	SINE/MIR,DNA/hAT-Charlie,LTR/ERVL-MaLR,SINE/Alu,SINE/Alu,SINE/Alu,LTR/ERVL-MaLR,SINE/Alu,LINE/L1,LTR/ERV1,LINE/L1,SINE/Alu,SINE/Alu	ALDH16A1
normal	N-12	Cluster 13	chr3	45785346-45786787	2	11	100	72.7		1442	mono:plus			SACM1L
normal	N-12	Cluster 14	chr9	125140151-125143913	16	726	99	0		3763	mono:plus	MIR1_Amn,MamGypLTR3a,AluJb,(AAAT)n,MER58A,MIRb,L1MC5a	SINE/MIR,LTR/Gypsy,SINE/Alu,Simple_repeat,DNA/hAT-Charlie,SINE/MIR,LINE/L1	PTGS1
normal	N-15	Cluster 3	chr11	71935146-71940671	2	25	0	100		5526	mono:plus	AluSz,MER20,MIRb,(GTCCCT)n	SINE/Alu,DNA/hAT-Charlie,SINE/MIR, Simple_repeat	INPPL1
normal	N-16	Cluster 2	chr17	22022135-22023763	3	12	0	91.7		1629	mono:plus	LSU-rRNA_Hsa	rRNA	MTRNR2L1
normal	N-17	Cluster 2	chr1	29213659-29214911	2	35	62.9	62.9		1253	mono:plus	AmnSINE2,(CCCGG)n,(TCTGTCG)n	SINE/tRNA-Deu,Simple_repeat,Simple_repeat	EPB41
normal	N-19	Cluster 2	chr1	246811196-246813073	2	17	100	47.1		1878	mono:plus	(T)n,L1MB4	Simple_repeat,LINE/L1	CNST
normal	N-19	Cluster 3	chr10	42393391-42395832	3	5.3	0	75.7		2442	mono:plus
normal	N-19	Cluster 4	chr11	63978724-63987908	3	59	100	28.8	hsa-piR-15181,hsa-piR-15183,hsa-piR-20116,hsa-piR-20117,hsa-piR-20118,hsa-piR-20792,hsa-piR-22269,hsa-piR-23197,hsa-piR-28117,hsa-piR-32002,hsa-piR-32652,	9185	mono:plus	(CCCCA)n,L2b,L2,AluSx,AluSp,HAL1,AluSq2,L1ME1,AluJr,AluSz,AluSx3,AluY,AluJb,L2c,(GGGCAG)n		FERMT3
normal	N-19	Cluster 7	chr17	19504624-19506692	35	749.4	2	98.2	hsa-piR-15181,hsa-piR-15182,hsa-piR-20792,hsa-piR-32002	2069	mono:plus	A-rich, tRNA-Leu-TTA(m),AluY,tRNA-Gln-CAA_	Low_complexity, tRNA,SINE/Alu, tRNA	RP11-1113L8.6, RP11-1113L8.7, MTND1P14, TRNAQ41P
normal	N-19	Cluster 8	chr19	1081526-1083378	3	93	83.9	0		1853	mono:plus	G-rich,(GGAGCT)n	Low_complexity, Simple_repeat	HMHA1
normal	N-19	Cluster 9	chr2	68622744-68624578	5	36	80.6	16.7		1835	mono:plus	MIR3		PLEK
normal	N-19	Cluster 12	chr8	41517954-41521709	109	133232	99.7	0	hsa-piR-1513,hsa-piR-15183,hsa-piR-26918	3756	mono:plus	MIRc,FLAM_C,MIRb,AluSx1,L2c,AluJo,(TG)n	SINE/MIR,SINE/Alu,SINE/MIR,SINE/Alu,LINE/L2,SINE/Alu,Simple_repeat	ANK1, MIR486, RP11-930P14.1
normal	N-20	Cluster 1	chr3	47040506-47050428	2	22	100	45.5		9923	mono:plus	(GTGGC)n,(TGC)n,MIRc	Simple_repeat,Simple_repeat,SINE/MIR	NBEAL2
normal	N-21	Cluster 7	chr6	26199751-26204920	2	19	57.9	57.9	hsa-piR-15570,hsa-piR-23197	5170	mono:plus	AluSp, Charlie4z, MLT1D, MER39B	SINE/Alu,DNA/hAT-Charlie,LTR/ERVL-MaLR,LTR/ERV1	HIST1H2BF, RP1-34B20.4, HIST1H4E
normal	N-21	Cluster 10	chrY	28784250-28786038	2	12	50	50		1789	mono:plus	(AATGG)n	Simple repeat
normal	N-22	Cluster 1	chr11	63978586-63987908	9	223	92.8	14.8	hsa-piR-15181,hsa-piR-15183,hsa-piR-20116,hsa-piR-20117,hsa-piR-20118,hsa-piR-20792,hsa-piR-22269,hsa-piR-23197,hsa-piR-28117,hsa-piR-32002,hsa-piR-32652,	9323	mono:plus	AluJb, AluJr, AluSp, AluSq2, AluSx, AluSx3, AluSz, AluY, (CCCCA)n, GA-rich, (GGGCAG)n, G-rich, HAL1, L1ME1, L2, L2b, L2c	SINE/Alu,SINE/Alu,SINE/Alu,SINE/Alu,SINE/Alu,SINE/Alu,SINE/Alu,SINE/Alu,Simple_repeat,Low_complexity,Simple_repeat,Low_complexity,LINE/L1,LINE/L1,LINE/L2,LINE/L2,LINE/L2	FERMT3
normal	N-22	Cluster 2	chr19	1081487-1082839	5	155	89	0		1353	mono:plus	(GGAGCT)n, G-rich	Simple repeat,Low_complexity	HMHA1
normal	N-22	Cluster 3	chr19	57880631-57881888	2	25	100	0		1258	mono:plus	AluSc, L2, MSTA	SINE/Alu,LINE/L2,LTR/ERVL-MaLR
normal	N-22	Cluster 4	chr6	32938664-32940027	6	44	77.3	22.7		1364	mono:plus	G-rich,(CG)n	Low_complexity, Simple_repeat	BRD2, XXbac-BPG181M17.6
normal	N-22	Cluster 6	chr9	125154547-125157005	6	68	79.4	0		2459	mono:plus	MIRb,L2a	SINE/MIR,LINE/L2	PTGS1
normal	N-6	Cluster 1	chr1	29213659-29214912	5	14	85.7	85.7		1254	mono:plus	AmnSINE2,(CCCGG)n,(TCTGTCG)n	SINE/tRNA-Deu,Simple_repeat,Simple_repeat	EPB41
normal	N-6	Cluster 2	chr11	63978022-63987908	6	29	93.1	10.3	hsa-piR-15181,hsa-piR-15183,hsa-piR-20116,hsa-piR-20117,hsa-piR-20118,hsa-piR-20792,hsa-piR-22269,hsa-piR-23197,hsa-piR-28117,hsa-piR-32002,hsa-piR-32652,	9887	mono:plus	AluJb, AluJr, AluSp, AluSq2, AluSx, AluSx3, AluSz, AluY, (CCCCA)n, GA-rich, (GGGCAG)n, G-rich, HAL1, L1ME1, L2, L2b, L2c	SINE/Alu,SINE/Alu,SINE/Alu,SINE/Alu,SINE/Alu,SINE/Alu,SINE/Alu,SINE/Alu,Simple_repeat,Low_complexity,Simple_repeat,Low_complexity,LINE/L1,LINE/L1,LINE/L2,LINE/L2,LINE/L2	FERMT3
normal	N-6	Cluster 3	chr6	29691497-29692952	3	5	80	0		1456	mono:plus	G-rich	Low_complexity	HLA-F, HCG4P11
normal	N-7	Cluster 1	chr17	19505003-19506691	17	72.3	0	97.2	hsa-piR-15181,hsa-piR-15182,hsa-piR-20792,hsa-piR-32002	1689	mono:plus	AluY, tRNA-Gln-CAA_, tRNA-Leu-TTA(m)	SINE/Alu,tRNA,tRNA	RP11-1113L8.6, RP11-1113L8.7, MTND1P14, TRNAQ41P
normal	N-8	Cluster 1	chr1	20235026-20236463	3	5	100	0	hsa-piR-24564	1438	mono:plus			OTUD3
normal	N-8	Cluster 2	chr11	63978021-63987908	9	32	93.8	9.4	hsa-piR-15181,hsa-piR-15183,hsa-piR-20116,hsa-piR-20117,hsa-piR-20118,hsa-piR-20792,hsa-piR-22269,hsa-piR-23197,hsa-piR-28117,hsa-piR-32002,hsa-piR-32652,	9888	mono:plus	AluJb, AluJr, AluSp, AluSq2, AluSx, AluSx3, AluSz, AluY, (CCCCA)n, GA-rich, (GGGCAG)n, G-rich, HAL1, L1ME1, L2, L2b, L2c	SINE/Alu,SINE/Alu,SINE/Alu,SINE/Alu,SINE/Alu,SINE/Alu,SINE/Alu,SINE/Alu,Simple_repeat,Low_complexity,Simple_repeat,Low_complexity,LINE/L1,LINE/L1,LINE/L2,LINE/L2,LINE/L2	FERMT3
normal	N-8	Cluster 4	chr11	65266766-65268191	5	8	12.5	75		1426	mono:plus	(GAAG)n	Simple_repeat	MALAT1
normal	N-8	Cluster 6	chr17	79480363-79481517	2	6	100	0		1155	mono:plus			RP13-766D20.2
normal	N-8	Cluster 7	chr19	1073237-1081823	12	46	80.4	0	hsa-piR-15181,hsa-piR-15182,hsa-piR-20115,hsa-piR-20116,hsa-piR-20117,hsa-piR-20118,hsa-piR-20792,hsa-piR-22269,hsa-piR-23197,hsa-piR-28117,hsa-piR-32652	8587	mono:plus	AluJr, AluJr4, AluSg4, AluSx, AluSx1, AluSz, AluY, (GGCG)n, G-rich, L1MC4a, L2c	SINE/Alu,SINE/Alu,SINE/Alu,SINE/Alu,SINE/Alu,SINE/Alu,SINE/Alu,Simple_repeat,Low_complexity,LINE/L1,LINE/L2	HMHA1
normal	N-8	Cluster 8	chr8	27290889-27291976	17	102	96.1	1		1088	mono:plus			PTK2B
normal	N-8	Cluster 10	chr9	125154547-125157008	8	15	100	0		2462	mono:plus	MIRb, L2a		PTGS1
normal	N-9	Cluster 1	chr11	63978724-63987908	7	24	100	33.3	hsa-piR-15181,hsa-piR-15183,hsa-piR-20116,hsa-piR-20117,hsa-piR-20118,hsa-piR-20792,hsa-piR-22269,hsa-piR-23197,hsa-piR-28117,hsa-piR-32002,hsa-piR-32652,	9185	mono:plus	AluJb, AluJr, AluSp, AluSq2, AluSx, AluSx3, AluSz, AluY, (CCCCA)n, (GGGCAG)n, HAL1, L1ME1, L2, L2b, L2c		FERMT3
CP	S-110	Cluster 1	chr1	29213659-29214911	4	6	50	50		1253	mono:plus	AmnSINE2, (CCCGG)n, (TCTGTCG)n	SINE/tRNA-Deu,Simple_repeat,Simple_repeat	EPB41
CP	S-110	Cluster 3	chr1	192153961-192156214	6	9	55.6	66.7		2254	mono:plus	L2c, MIRb		RGS18
CP	S-110	Cluster 4	chr11	63978020-63987908	19	84	86.9	2.4	hsa-piR-15181,hsa-piR-15183,hsa-piR-20116,hsa-piR-20117,hsa-piR-20118,hsa-piR-20792,hsa-piR-22269,hsa-piR-23197	9889	mono:plus	AluJb, AluJr, AluSp, AluSq2, AluSx, AluSx3, AluSz, AluY, (CCCCA)n, GA-rich, (GGGCAG)n, G-rich, HAL1, L1ME1, L2, L2b, L2c	SINE/Alu,SINE/Alu,SINE/Alu,SINE/Alu,SINE/Alu,SINE/Alu,SINE/Alu,SINE/Alu,Simple_repeat,Low_complexity,Simple_repeat,Low_complexity,LINE/L1,LINE/L1,LINE/L2,LINE/L2,LINE/L2	FERMT3
CP	S-110	Cluster 8	chr19	16212177-16213751	5	11	36.4	90.9		1575	mono:plus	AluSz		TPM4
CP	S-110	Cluster 10	chr20	35176524-35177937	4	6	16.7	83.3		1414	mono:plus	MIR		MYL9, RP5-977B1.11
CP	S-110	Cluster 12	chr4	79835315-79837392	4	5	80	0		2078	mono:plus	MIR, (AT)n		BMP2K, PAQR3
CP	S-110	Cluster 14	chr9	125154588-125157005	6	12	83.3	0		2418	mono:plus	MIRb, L2a		PTGS1
CP	S-118	Cluster 2	chr11	63978023-63987908	6	35	82.9	0	hsa-piR-15181,hsa-piR-15183,hsa-piR-20116,hsa-piR-20117,hsa-piR-20118,hsa-piR-20792,hsa-piR-22269,hsa-piR-23197	9886	mono:plus	AluJb, AluJr, AluSp, AluSq2, AluSx, AluSx3, AluSz, AluY, (CCCCA)n, GA-rich, (GGGCAG)n, G-rich, HAL1, L1ME1, L2, L2b, L2c	SINE/Alu,SINE/Alu,SINE/Alu,SINE/Alu,SINE/Alu,SINE/Alu,SINE/Alu,SINE/Alu,Simple_repeat,Low_complexity,Simple_repeat,Low_complexity,LINE/L1,LINE/L1,LINE/L2,LINE/L2,LINE/L2	FERMT3
CP	S-118	Cluster 6	chr20	29815125-29816841	3	5.5	27.3	100		1717	mono:plus
CP	S-129	Cluster 2	chr11	63978724-63987908	6	37	100	5.4	hsa-piR-15181,hsa-piR-15183,hsa-piR-20116,hsa-piR-20117,hsa-piR-20118,hsa-piR-20792,hsa-piR-22269,hsa-piR-23197	9185	mono:plus	AluJb, AluJr, AluSp, AluSq2, AluSx, AluSx3, AluSz, AluY, (CCCCA)n, (GGGCAG)n, HAL1, L1ME1, L2, L2b, L2c		FERMT3
CP	S-129	Cluster 3	chr14	105147058-105148683	2	5	80	0		1626	mono:plus	(CA)n	Simple_repeat	RP11-982M15.6
CP	S-129	Cluster 4	chr17	166174-167830	4	8.5	0	82.4		1657	mono:plus	CER	Satellite
CP	S-129	Cluster 5	chr9	131104498-131112715	5	13	92.3	38.5		8218	mono:plus	AluJb, AluJo, AluSx, AluSx3, AluSz, FLAM_C, GA-rich, (GGTG)n, L2b, L2c, L2d2, MIR, MIR3, MIRb, MIRc	SINE/Alu,SINE/Alu,SINE/Alu,SINE/Alu,SINE/Alu,SINE/Alu,Low_complexity,Simple_repeat,LINE/L2,LINE/L2,LINE/L2,SINE/MIR,SINE/MIR,SINE/MIR,SINE/MIR	SLC27A4,TMSB4XP4
CP	S-27	Cluster 1	chr17	19503293-19506691	16	39.9	0	97.5	hsa-piR-15181,hsa-piR-15182,hsa-piR-20792,hsa-piR-22269	3399	mono:plus	AluY, A-rich, tRNA-Gln-CAA_, tRNA-Leu-TTA(m)	SINE/Alu, Low_complexity,tRNA,tRNA	RP11-1113L8.6, RP11-1113L8.7, MTND1P14, TRNAQ41P
CP	S-31	Cluster 1	chr1	29213659-29214911	3	8	87.5	87.5		1253	mono:plus	AmnSINE2, (CCCGG)n, (TCTGTCG)n	SINE/tRNA-Deu,Simple_repeat,Simple_repeat	EPB41
CP	S-31	Cluster 2	chr1	166821878-166823003	2	7	100	0		1126	mono:plus			POGK
CP	S-31	Cluster 3	chr11	63978022-63987908	12	46	78.3	15.2	hsa-piR-15181,hsa-piR-15183,hsa-piR-20116,hsa-piR-20117,hsa-piR-20118,hsa-piR-20792,hsa-piR-22269,hsa-piR-23197	9887	mono:plus	AluJb, AluJr, AluSp, AluSq2, AluSx, AluSx3, AluSz, AluY, (CCCCA)n, GA-rich, (GGGCAG)n, G-rich, HAL1, L1ME1, L2, L2b, L2c	SINE/Alu,SINE/Alu,SINE/Alu,SINE/Alu,SINE/Alu,SINE/Alu,SINE/Alu,SINE/Alu,Simple_repeat,Low_complexity,Simple_repeat,Low_complexity,LINE/L1,LINE/L1,LINE/L2,LINE/L2,LINE/L2	FERMT3
CP	S-31	Cluster 7	chr3	63985624-63987004	2	6	50	50		1381	mono:plus			ATXN7
CP	S-31	Cluster 8	chr4	74285304-74286849	3	7	42.9	100		1546	mono:plus	MIR, MADE2	SINE/MIR,DNA/TcMar-Mariner	ALB
CP	S-31	Cluster 9	chr4	74719013-74720190	8	15	6.7	86.7		1178	mono:plus			PF4V1
CP	S-86	Cluster 1	chr11	63978018-63988590	7	27	96.3	11.1	hsa-piR-15181,hsa-piR-15183,hsa-piR-20116,hsa-piR-20117,hsa-piR-20118,hsa-piR-20792,hsa-piR-22269,hsa-piR-23197	10573	mono:plus	AluJb, AluJr, AluSp, AluSq2, AluSx, AluSx3, AluSz, AluY, (CCCCA)n, GA-rich, (GGGCAG)n, G-rich, HAL1, L1ME1, L2, L2b, L2c	SINE/Alu,SINE/Alu,SINE/Alu,SINE/Alu,SINE/Alu,SINE/Alu,SINE/Alu,SINE/Alu,Simple_repeat,Low_complexity,Simple_repeat,Low_complexity,LINE/L1,LINE/L1,LINE/L2,LINE/L2,LINE/L2	FERMT3
CP	S-86	Cluster 3	chr19	1079901-1081823	6	22	77.3	4.5		1923	mono:plus	G-rich		HMHA1
Tumor	CN-1	Cluster 3	chr12	38000438-38001968	3	13.3	60.4	60.4		1531	mono:plus	ALR/Alpha	Satellite/centr
Tumor	CN-1	Cluster 5	chr17	19502633-19506695	81	1128.7	7.7	84.7	hsa-piR-15181,hsa-piR-15182,hsa-piR-20792,hsa-piR-22269,hsa-piR-32002	4063	mono:plus	AluY, A-rich,tRNA-Leu-TTA(m),tRNA-Gln-CAA_	SINE/Alu, Low_complexity, tRNA, tRNA	RP11-1113L8.6, RP11-1113L8.7, MTND1P14, TRNAQ41P
Tumor	CN-1	Cluster 6	chr19	1081526-1083109	3	38	100	0		1584	mono:plus	G-rich, (GGAGCT)n,		HMHA1
Tumor	S-113	Cluster 2	chr1	246829348-246831272	3	20	0	100		1925	mono:plus	(TGTG)n	Simple_repeat	CNST
Tumor	S-113	Cluster 3	chr11	63978724-63987908	4	161	100	18.6	hsa-piR-15181,hsa-piR-15183,hsa-piR-20116,hsa-piR-20117,hsa-piR-20118,hsa-piR-20792,hsa-piR-22269,hsa-piR-23197,hsa-piR-28117,hsa-piR-32002,hsa-piR-32652	9185	mono:plus	AluJb, AluJr, AluSp, AluSq2, AluSx, AluSx3, AluSz, AluY, (CCCCA)n, (GGGCAG)n, HAL1, L1ME1, L2, L2b, L2c		FERMT3
Tumor	S-113	Cluster 5	chr14	106387322-106395268	4	20.2	78.5	0		7947	mono:plus	(GAGG)n, (GA)n, L1M4, MIR, MLT1A1, MLT1D	Simple_repeat,Simple_repeat,LINE/L1,SINE/MIR,LTR/ERVL-MaLR,LTR/ERVL-MaLR	KIAA0125
Tumor	S-113	Cluster 6	chr15	20218323-20224924	2	10.6	100	0		6602	mono:plus	GA-rich, (GGAC)n, L1M4, MIR1_Amn, MIRb, MLT1A1, MLT1D
Tumor	S-113	Cluster 7	chr15	45007796-45010103	3	26	96.2	34.6		2308	mono:plus	5S, L2c, MIRc, Tigger3a		B2M
Tumor	S-113	Cluster 8	chr16	9210604-9212329	2	37	54.1	100		1726	mono:plus	(ATTAT)n	Simple_repeat	C16orf72
Tumor	S-113	Cluster 10	chr17	19503294-19506696	104	4629.4	0.9	96	hsa-piR-15181,hsa-piR-15182,hsa-piR-20792,hsa-piR-22269,hsa-piR-32002,hsa-piR-32859	3403	mono:plus	AluY, A-rich, tRNA-Gln-CAA_, tRNA-Leu-TTA(m)	SINE/Alu,Low_complexity,tRNA,tRNA	RP11-1113L8.6, RP11-1113L8.7, MTND1P14, TRNAQ41P
Tumor	S-113	Cluster 12	chr18	3510563-3513396	3	41	100	48.8		2834	mono:plus	(AGTAGAA)n, FAM, FLAM_C, (GTTTT)n, L1MB1, L1ME3C, MIRc	Simple_repeat,SINE/Alu,SINE/Alu,Simple_repeat,LINE/L1,LINE/L1,SINE/MIR
Tumor	S-113	Cluster 14	chr20	32232254-32235993	3	38	52.6	52.6	hsa-piR-1513,hsa-piR-20056,hsa-piR-20436	3740	mono:plus	AluSp, AluSx1, AluSz, L1MD2, L3	SINE/Alu,SINE/Alu,SINE/Alu,LINE/L1,LINE/CR1	CBFA2T2
Tumor	S-113	Cluster 15	chr4	74719013-74720199	3	24	4.2	100		1187	mono:plus			PF4V1
Tumor	S-113	Cluster 20	chr9	33657578-33659117	8	55.4	26.2	90.7		1540	mono:plus	LSU-rRNA_Hsa	rRNA
Tumor	S-113	Cluster 21	chr9	125140151-125143912	13	1216	98.5	0		3762	mono:plus	(AAAT)n, AluJb, L1MC5a, MamGypLTR3a, MER58A, MIR1_Amn, MIRb	Simple_repeat,SINE/Alu,LINE/L1.LTR/Gypsy,DNA/hAT-Charlie,SINE/MIR,SINE/MIR	PTGS1
Tumor	S-128-T	Cluster 1	chr1	29213659-29214911	3	9	88.9	88.9		1253	mono:plus	AmnSINE2, (CCCGG)n, (TCTGTCG)n	SINE/tRNA-Deu,Simple_repeat,Simple_repeat	EPB41
Tumor	S-128-T	Cluster 2	chr11	63978705-63987908	8	20	90	25	hsa-piR-15181,hsa-piR-15183,hsa-piR-20116,hsa-piR-20117,hsa-piR-20118,hsa-piR-20792,hsa-piR-22269,hsa-piR-23197,hsa-piR-28117,hsa-piR-32002,hsa-piR-32652	9204	mono:plus	AluJb, AluJr, AluSp, AluSq2, AluSx, AluSx3, AluSz, AluY, (CCCCA)n, (GGGCAG)n, HAL1, L1ME1, L2, L2b, L2c		FERMT3
Tumor	S-128-T	Cluster 5	chr17	7809613-7810672	2	5	80	0	hsa-piR-32154,hsa-piR-32155,hsa-piR-32165	1060	mono:plus	(CTGCCT)n	Simple_repeat	CHD3
Tumor	S-133-T	Cluster 1	chr4	74279195-74280877	2	5	80	20		1683	mono:plus	AluSp, (ATCTA)n, MIR		ALB
Tumor	S-134-T	Cluster 1	chr11	63986775-63987908	3	9	100	11.1		1134	mono:plus	(GGGCAG)n	Simple_repeat	FERMT3
Tumor	S-156	Cluster 5	chr11	48175304-48177594	4	30	100	83.3		2291	mono:plus	MIR, MIRb		PTPRJ
Tumor	S-156	Cluster 6	chr12	32866154-32871615	2	38	76.3	23.7	hsa-piR-13413,hsa-piR-22269,hsa-piR-30603	5462	mono:plus	AluJb, AluSx1, AluSz, AluSz6, AluY, (AT)n, FLAM_A, FRAM, L1M5, L1ME1, L1ME4c, (TA)n		DNM1L
Tumor	S-156	Cluster 7	chr15	39886525-39887769	2	13	61.5	61.5		1245	mono:plus	MamRep434, (TTTA)n	DNA/TcMar-Tigger,Simple_repeat	THBS1
Tumor	S-156	Cluster 8	chr16	2812309-2817561	2	14	64.3	64.3	hsa-piR-23886,hsa-piR-32449,hsa-piR-32737	5253	mono:plus	MamRTE1	LINE/RTE-BovB	SRRM2
Tumor	S-156	Cluster 9	chr17	72734926-72742894	2	24	100	0	hsa-piR-12190,hsa-piR-20792,hsa-piR-26918	7969	mono:plus	AluSc8, AluSg, AluSp, AluSx3, AluSz, (CCCAG)n, (GAGGCTG)n, G-rich, L2d2, MER117, MIR	SINE/Alu,SINE/Alu,SINE/Alu,SINE/Alu,SINE/Alu,Simple_repeat,Simple_repeat,Low_complexity,LINE/L2,DNA/hAT-Charlie,SINE/MIR	RAB37
Tumor	S-156	Cluster 12	chr19	1074060-1081824	5	92	93.5	0	hsa-piR-15181,hsa-piR-15182,hsa-piR-20115,hsa-piR-20116,hsa-piR-20117,hsa-piR-20118,hsa-piR-20792,hsa-piR-22269,hsa-piR-23197,hsa-piR-28117,hsa-piR-32652	7765	mono:plus	AluJr, AluJr4, AluSg4, AluSx, AluSx1, AluSz, AluY, (GGCG)n, G-rich, L1MC4a		HMHA1
Tumor	S-156	Cluster 15	chr20	44521509-44527432	2	17	100	64.7	hsa-piR-28117,hsa-piR-32652	5924	mono:plus	AluJo, AluJr, AluSg, AluSq, AluSz6, MER20B, MIR, MIR3, MIRb		CTSA, RP3-337O18.9, PLTP
Tumor	S-156	Cluster 18	chr3	23960694-23961698	3	15.5	38.7	100		1005	mono:plus			RPL15
Tumor	S-156	Cluster 19	chr5	76003143-76012125	2	17	35.3	100		8983	mono:plus	AluJb, AluSp, AluSq2, AluSz, AluY, (CCGCGC)n, GA-rich, (GTTT)n, Kanga1c, MER9a3, MLT1J	SINE/Alu,SINE/Alu,SINE/Alu,SINE/Alu,SINE/Alu,Simple_repeat,Low_complexity,Simple_repeat,DNA/TcMar-Tc2,LTR/ERVK,LTR/ERVL-MaLR	IQGAP2, CTD-2384B11.2, F2R
Tumor	S-156	Cluster 20	chr6	30457294-30459431	3	20	85	70		2138	mono:plus			HLA-E
Tumor	S-156	Cluster 22	chr9	125137654-125140697	17	951	98.8	0		3044	mono:plus	(CCGCC)n, L3b, MIR3, MIRc, (TG)n		PTGS1
Tumor	S-156	Cluster 23	chr9	125154588-125157010	4	32	100	0		2423	mono:plus	MIRb, L2a		PTGS1
Tumor	S-156	Cluster 25	chrX	67941423-67946692	4	20	100	0		5270	mono:plus	(AC)n, (AT)n, (CCCCTG)n	Simple_repeat,Simple_repeat,Simple_repeat	STARD8
Tumor	S-158	Cluster 3	chr11	63978724-63987909	7	90	100	15.6	hsa-piR-15181,hsa-piR-15183,hsa-piR-20116,hsa-piR-20117,hsa-piR-20118,hsa-piR-20792,hsa-piR-22269,hsa-piR-23197,hsa-piR-28117,hsa-piR-32002,hsa-piR-32652	9186	mono:plus	AluJb, AluJr, AluSp, AluSq2, AluSx, AluSx3, AluSz, AluY, (CCCCA)n, (GGGCAG)n, HAL1, L1ME1, L2, L2b, L2c		FERMT3
Tumor	S-158	Cluster 5	chr12	12619615-12620881	2	12	25	75		1267	mono:plus	AluJr, MLT2F	SINE/Alu,LTR/ERVL	LOH12CR1
Tumor	S-158	Cluster 7	chr12	57918740-57923928	3	17	70.6	70.6		5189	mono:plus	(C)n, (GTGG)n, MIRc		MBD6, DCTN2
Tumor	S-158	Cluster 8	chr12	110787849-110788862	2	7	0	100		1014	mono:plus			ATP2A2
Tumor	S-158	Cluster 16	chr19	9271291-9272920	3	8	0	75		1630	mono:plus	Cheshire, MER20	DNA/hAT-Charlie,DNA/hAT-Charlie	ZNF317
Tumor	S-158	Cluster 18	chr2	65488406-65497572	2	15	53.3	100	hsa-piR-18867,hsa-piR-22269,hsa-piR-23197	9167	mono:plus	AluJb, AluSc, AluSg4, AluSz6, AluYm1, (AT)n, L1M2, L1MC4, L1MC5a, L2a, MER58A, MER94, MIRb, MIRc, Tigger15a		ACTR2
Tumor	S-158	Cluster 19	chr2	106509371-106510718	3	7	85.7	42.9		1348	mono:plus	PRIMA4-int	LTR/ERV1	NCK2
Tumor	S-158	Cluster 20	chr2	173349901-173355903	3	21	100	0	hsa-piR-26918	6003	mono:plus	AluSz, L2b, MIR, MIRb	SINE/Alu,LINE/L2,SINE/MIR,SINE/MIR	ITGA6
Tumor	S-158	Cluster 26	chr8	38708480-38710536	3	14	100	85.7		2057	mono:plus	UCON26		TACC1
Tumor	S-158	Cluster 27	chr8	56922909-56923941	2	10	100	0		1033	mono:plus			LYN
Tumor	S-158	Cluster 28	chr9	125154588-125157005	4	39	100	0		2418	mono:plus	MIRb, L2a		PTGS1
Tumor	S-161	Cluster 1	chr1	29213659-29214911	3	61	70.5	70.5		1253	mono:plus	AmnSINE2, (CCCGG)n, (TCTGTCG)n	SINE/tRNA-Deu,Simple_repeat,Simple_repeat	EPB41
Tumor	S-161	Cluster 3	chr1	142539746-142541776	3	12	88.9	0		2031	mono:plus	Alu, FRAM, (GGAAT)n	SINE/Alu,SINE/Alu,Simple_repeat
Tumor	S-161	Cluster 4	chr1	154295995-154304082	3	64	100	29.7		8088	mono:plus	(CCGCCG)n, (CGAGG)n, (GCTCCCC)n	Simple_repeat,Simple_repeat,Simple_repeat	AQP10, ATP8B2
Tumor	S-161	Cluster 6	chr11	63978724-63987908	3	131	100	13.7	hsa-piR-15181,hsa-piR-15183,hsa-piR-20116,hsa-piR-20117,hsa-piR-20118,hsa-piR-20792,hsa-piR-22269,hsa-piR-23197,hsa-piR-28117,hsa-piR-32002,hsa-piR-32652	9185	mono:plus	AluJb, AluJr, AluSp, AluSq2, AluSx, AluSx3, AluSz, AluY, (CCCCA)n, (GGGCAG)n, HAL1, L1ME1, L2, L2b, L2c		FERMT3
Tumor	S-161	Cluster 7	chr11	64973880-64977484	4	43	100	0		3605	mono:plus	AluJb, AluSx1, AluSz, MIRb, MIRc	SINE/Alu,SINE/Alu,AluSz,SINE/MIR,SINE/MIR	CAPN1
Tumor	S-161	Cluster 12	chr19	13054655-13063504	2	73	75.3	0	hsa-piR-12263,hsa-piR-20792	8850	mono:plus	AluJo, AluJr, AluSc8, AluSg, AluSp, AluSx1, AluSz, AluY, FLAM_C, GA-rich, (GCCCCG)n, G-rich, L2a, L2b, MIR, MIRb, (T)n		CALR, CTC-425F1.4 , RAD23A
Tumor	S-161	Cluster 16	chr6	30457294-30460949	3	33	100	0		3656	mono:plus	AluSx3, AluYk2	SINE/Alu,SINE/Alu	HLA-E
Tumor	S-161	Cluster 19	chr7	30197055-30198390	4	48	100	31.3		1336	mono:plus			MTURN, AC007036.5
Tumor	S-44	Cluster 2	chr1	16368386-16369492	2	14	71.4	71.4		1107	mono:plus	MIRb
Tumor	S-44	Cluster 3	chr10	38777699-38782151	4	20	45	95		4453	mono:plus	(ATGGAATGGA)n	Simple_repeat
Tumor	S-44	Cluster 6	chr11	118982878-118989613	3	25	100	0		6736	mono:plus	AluJb, AluSg, (CCCTCC)n, Charlie13a, CR1_Mam, (CTCCTC)n, L1PB4, MIR, MIR3, X7C_LINE	SINE/Alu,SINE/Alu,Simple_repeat,DNA/hAT-Charlie,LINE/CR1,Simple_repeat,LINE/L1,SINE/MIR,SINE/MIR,LINE/CR1	C2CD2L
Tumor	S-44	Cluster 7	chr12	12870676-12875255	2	12	100	0	hsa-piR-26552	4580	mono:plus	MER20, (TTTGT)n, X2b_DNA		CDKN1B
Tumor	S-44	Cluster 9	chr13	76613594-76622434	3	15	0	100		8841	mono:plus	(ATGTAC)n, L1M, L1ME4a, MIR, MLT1A, (TG)n, (TTTC)n	Simple_repeat,LINE/L1,LINE/L1,SINE/MIR,LTR/ERVL-MaLR,Simple_repeat,Simple_repeat
Tumor	S-44	Cluster 10	chr15	39885369-39887963	7	38	71.1	73.7		2595	mono:plus	MamRep434, (TTTA)n	DNA/TcMar-Tigger,Simple_repeat	THBS1, CTD-2033D15.1
Tumor	S-44	Cluster 12	chr19	1065462-1083326	6	62	75.8	0	hsa-piR-15181,hsa-piR-15182,hsa-piR-18867,hsa-piR-20115,hsa-piR-20116,hsa-piR-20117,hsa-piR-20118,hsa-piR-20792,hsa-piR-22269,hsa-piR-23197,hsa-piR-28117,hsa-piR-32652	17865	mono:plus	AluJo, AluJr, AluJr4, AluSg4, AluSx, AluSx1, AluSx4, AluSz, AluY, (GGAGCT)n, (GGCG)n, G-rich, L1MC4a, L2, L2b, L2c, MIR1_Amn, MIR3, MIRc, (TTTTC)n		ABCA7, HMHA1
Tumor	S-44	Cluster 13	chr19	13051224-13054683	2	40	100	0	hsa-piR-20792,hsa-piR-23197	3460	mono:plus	AluJr, AluSp, AluSz6, AluY, GA-rich, L2a, MIR		CALR
Tumor	S-44	Cluster 14	chr19	16630302-16634620	3	21	57.1	57.1	hsa-piR-20792, hsa-piR-22269	4319	mono:plus	AluYk2, (GGACCG)n, (GGAGCG)n, G-rich, MLT1B	SINE/Alu,Simple_repeat,Simple_repeat,Low_complexity,LTR/ERVL-MaLR	C19orf44, CHERP
Tumor	S-44	Cluster 15	chr22	42093647-42103330	3	48	89.6	0	hsa-piR-20792,hsa-piR-22269,hsa-piR-23197,hsa-piR-29436	9684	mono:plus	AluJr, AluJr4, AluSc8, AluSp, AluSq10, AluSq2, AluSx, AluSx1, AluSx3, AluSz, AluY, Charlie1, Charlie1b, L2c, L2d2, LTR50, MIR, MIRb, MIRc, (T)n		C22orf46, MEI1
Tumor	S-44	Cluster 18	chr8	97060223-97061313	2	8	12.5	87.5		1091	mono:plus	AluJb, (ATAC)n, L1ME4b, L2a	SINE/Alu,Simple_repeat,LINE/L1,LINE/L2
Tumor	S-44	Cluster 19	chr9	125140153-125143914	11	483	97.1	0		3762	mono:plus	(AAAT)n, AluJb, L1MC5a, MamGypLTR3a, MER58A, MIR1_Amn, MIRb	Simple_repeat,SINE/Alu,LINE/L1.LTR/Gypsy,DNA/hAT-Charlie,SINE/MIR,SINE/MIR	PTGS1
Tumor	S-45	Cluster 1	chr1	29213659-29214911	2	21	57.1	57.1		1253	mono:plus	AmnSINE2, (CCCGG)n, (TCTGTCG)n	SINE/tRNA-Deu,Simple_repeat,Simple_repeat	EPB41
Tumor	S-45	Cluster 2	chr1	192150551-192154155	2	13	100	38.5		3605	mono:plus	L1MA6, L1MB5, L3, MIR3, MSTA	LINE/L1,LINE/L1,LINE/CR1,SINE/MIR,LTR/ERVL-MaLR	RGS18
Tumor	S-45	Cluster 5	chr15	39886525-39887963	2	7	0	85.7		1439	mono:plus	MamRep434, (TTTA)n	DNA/TcMar-Tigger,Simple_repeat	THBS1
Tumor	S-45	Cluster 7	chr3	188602462-188607143	5	49	77.6	0		4682	mono:plus	L1PA3, (AC)n	LINE/L1,Simple_repeat	LPP
Tumor	S-45	Cluster 8	chr4	74277711-74283966	3	33	84.8	39.4		6256	mono:plus	AluSp, AluSx3, A-rich, (ATCTA)n, L2c, MIR, (TG)n, X7A_LINE		ALB
Tumor	S-45	Cluster 9	chr6	30458097-30461642	5	43	79.1	62.8		3546	mono:plus	AluSx3, AluYk2, MSTC, MST-int	SINE/Alu,SINE/Alu,LTR/ERVL-MaLR,LTR/ERVL-MaLR	HLA-E
Tumor	S-52	Cluster 4	chr10	38793088-38795402	3	14	78.6	0		2315	mono:plus
Tumor	S-52	Cluster 5	chr10	49798242-49802961	3	25	64	64		4720	mono:plus	AluJb, (CAA)n, FLAM_A, G-rich, L1ME3G, L2a, LTR16A2, MER44B, MIR	SINE/Alu,Simple_repeat,SINE/Alu,Low_complexity,LINE/L1,LINE/L2,LTR/ERVL,DNA/TcMar-Tigger,SINE/MIR
Tumor	S-52	Cluster 6	chr11	63978019-63991293	9	91	78	17.6	hsa-piR-15181,hsa-piR-15183,hsa-piR-20116,hsa-piR-20117,hsa-piR-20118,hsa-piR-20792,hsa-piR-22269,hsa-piR-23197,hsa-piR-28117,hsa-piR-32002,hsa-piR-32652	13275	mono:plus	(AAAT)n, AluJb, AluJr, AluSg, AluSp, AluSq2, AluSx, AluSx1, AluSx3, AluSz, AluY, (CCCCA)n, GA-rich, (GCCCCT)n, (GGGCAG)n, G-rich, HAL1, L1ME1, L2, L2b, L2c, MIRc		FERMT3, TRPT1
Tumor	S-52	Cluster 7	chr11	118982877-118989613	6	61	77	23		6737	mono:plus	AluJb, AluSg, (CCCTCC)n, Charlie13a, CR1_Mam, (CTCCTC)n, L1PB4, MIR, MIR3, X7C_LINE	SINE/Alu,SINE/Alu,Simple_repeat,DNA/hAT-Charlie,LINE/CR1,Simple_repeat,LINE/L1,SINE/MIR,SINE/MIR,LINE/CR1	C2CD2L
Tumor	S-52	Cluster 11	chr14	93041286-93042946	4	32	100	0		1661	mono:plus	MIR,MER41B,MIRb	SINE/MIR,LTR/ERV1,SINE/MIR	RIN3
Tumor	S-52	Cluster 16	chr2	74780446-74781581	4	32	100	84.4		1136	mono:plus	(TCTCCCT)n,(GCG)n	Simple_repeat	LOXL3, DOK1
Tumor	S-52	Cluster 21	chr4	190155069-190156319	6	11	100	0		1251	mono:plus
Tumor	S-52	Cluster 27	chr9	125133328-125140176	21	1534	98.2	0		6849	mono:plus	(CCGCC)n, (CTCCTG)n, L2b, L2d2, L3b, MIR3, MIRb, MIRc, (TG)n		PTGS1, RP11-498E2.9
Tumor	S-52	Cluster 28	chr9	125154588-125157425	4	72	88.9	0		2838	mono:plus	L2a, L2c, MIRb, MLT1N2	LINE/L2,LINE/L2,SINE/MIR,LTR/ERVL-MaLR	PTGS1
Tumor	S-61	Cluster 1	chr1	29213659-29214912	2	8	62.5	62.5		1254	mono:plus	AmnSINE2, (CCCGG)n, (TCTGTCG)n	SINE/tRNA-Deu,Simple_repeat,Simple_repeat	EPB41
Tumor	S-61	Cluster 3	chr1	192153848-192154946	6	6	66.7	50		1099	mono:plus			RGS18
Tumor	S-61	Cluster 4	chr17	19502632-19506698	58	532.2	1.3	97.4	hsa-piR-15181,hsa-piR-15182,hsa-piR-20792,hsa-piR-22269,hsa-piR-32002,hsa-piR-32859	4067	mono:plus	AluY, A-rich, tRNA-Gln-CAA_, tRNA-Leu-TTA(m)	SINE/Alu,Low_complexity,tRNA,tRNA	RP11-1113L8.6, RP11-1113L8.7, MTND1P14, TRNAQ41P
Tumor	S-61	Cluster 5	chr19	16212687-16213751	2	5	0	100		1065	mono:plus	AluSz	SINE/Alu	TPM4
Tumor	S-71	Cluster 1	chr1	2893206-2894528	2	8	62.5	62.5		1323	mono:plus
Tumor	S-71	Cluster 2	chr11	64362460-64363646	3	12	0	75		1187	mono:plus	(ATGG)n	Simple_repeat
